# Supplementary material for: Novel strategy for improving the oxygen permeability of zirconia-based dual-phase membranes
Source: Royal Society of Chemistry journal article supplement (doi:10.1039/c8ee03105c), 2019-01-01
Supplement: c8ee03105c1.pdf [file c8ee03105c1.pdf]

## Supplementary Information

### **Novel strategy for improving the oxygen permeability of the zirconia-based dual-phase membranes**

Young-il Kwon<sup>a</sup>, Jong Hyuk Park<sup>a,b</sup>, Sin Myung Kang<sup>a</sup>, Gyeong Duk Nam<sup>a</sup>, Jung Won Lee<sup>a</sup>, Jin Ho Kim<sup>a</sup>, Dongyoung Kim<sup>c</sup>, Sang Mun Jeong<sup>d</sup>, Ji Haeng Yu<sup>b</sup> and Jong Hoon Joo<sup>a\*</sup>

<sup>a</sup> Department of Advanced Material Engineering, Chungbuk National University, 1Chungdae-ro, Seowon-gu, Cheongju, Chungbuk 28644, (Republic of Korea)

<sup>b</sup> Korea Institute of Energy Research, Separation and Conversion Materials Laboratory, 152 Gajeong-ro, Daejeon, Chungnam 34129, (Republic of Korea)

<sup>c</sup> Semiconductor R&D Center, Samsung Electronics, 1-1 Samsungjeonja-ro, Hwasung, Gyeonggi-do 18448, (Republic of Korea)

<sup>d</sup> Department of Chemical Engineering, Chungbuk National University, 1Chungdae-ro, Seowon-gu, Cheongju, Chungbuk 28644, (Republic of Korea)

\*The corresponding author, E-mail: [jhjoo@chungbuk.ac.kr](mailto:jhjoo@chungbuk.ac.kr), [jonghoonjoo@gmail.com](mailto:jonghoonjoo@gmail.com)

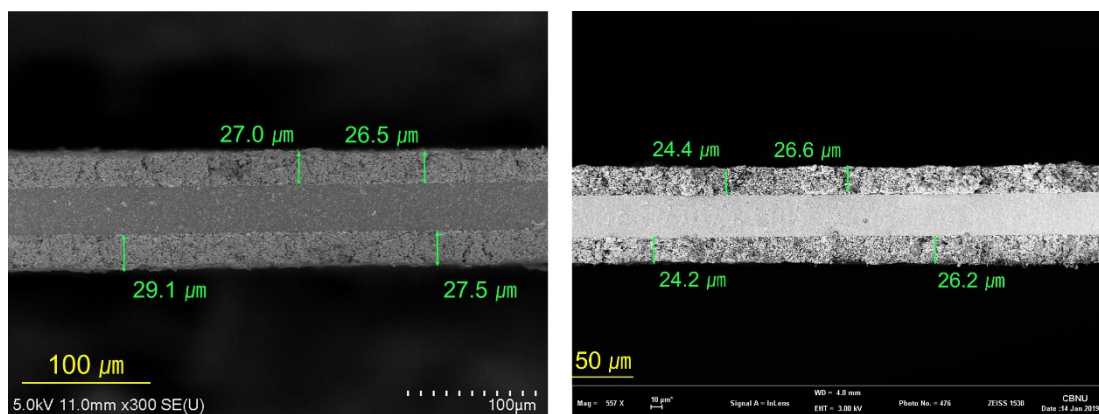

**Fig. S1** Low magnification cross-sectional SEM image of NNO coated membrane.

The thickness of the coating layers was controlled by the number of printing, and low resolution SEM images of cross-section were shown **fig. S1**. The coating layer was uniformly formed on both sides of the membrane with a thickness of about 24 to 29 μm, and it is confirmed that the thickness of coating layer was reproducible as well as homogeneous in this study.

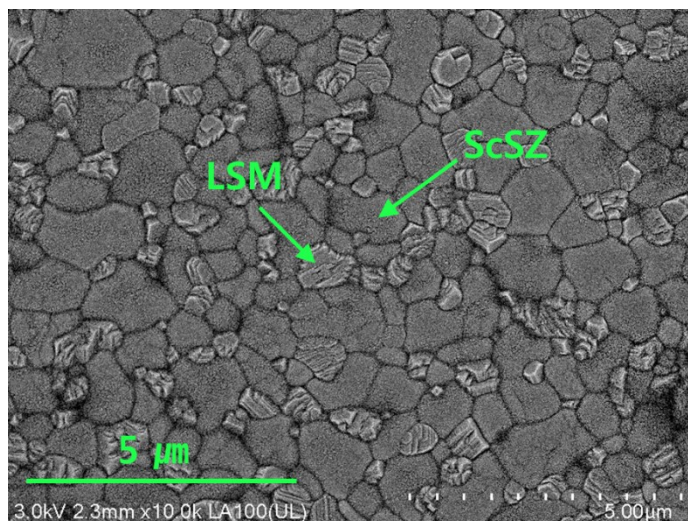

**Fig. S2** Back-scattered electron image of 70 vol.% ScSZ- 30 vol.% LSM composite membrane (light grains: LSM, dark grains: ScSZ).

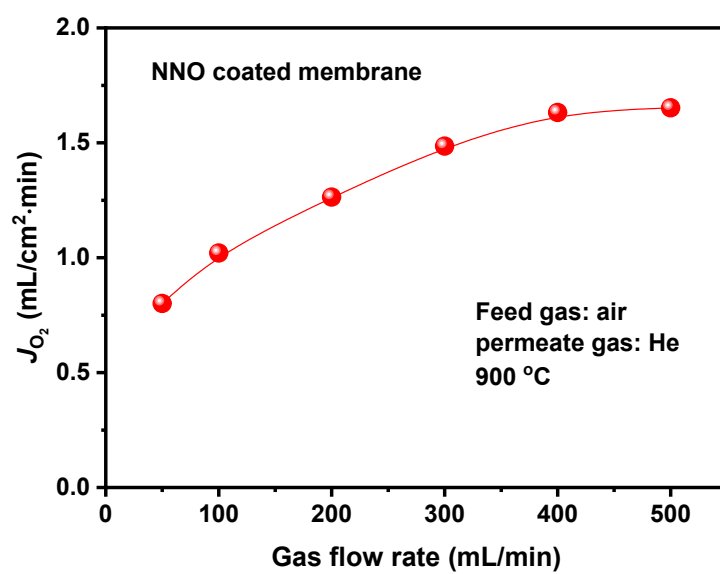

**Fig. S3** Oxygen permeation flux of NNO coated membrane as a function of the flow rate of sweeping gas at 900 °C (feed side: synthetic air, permeate side: He).

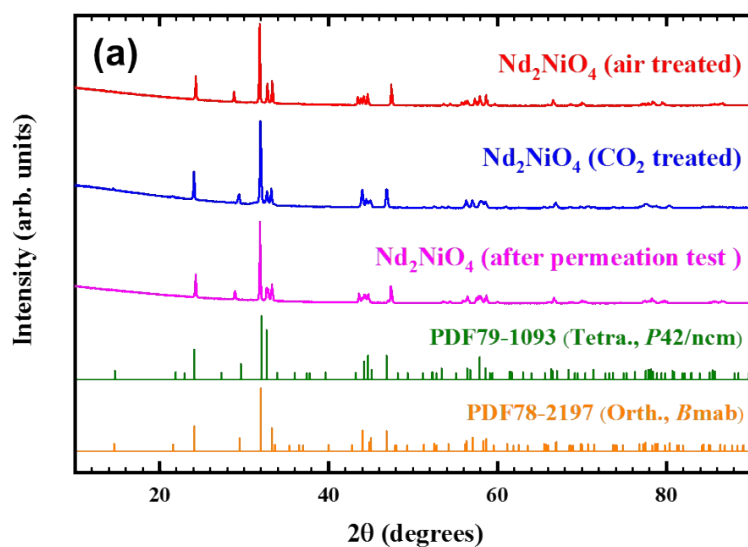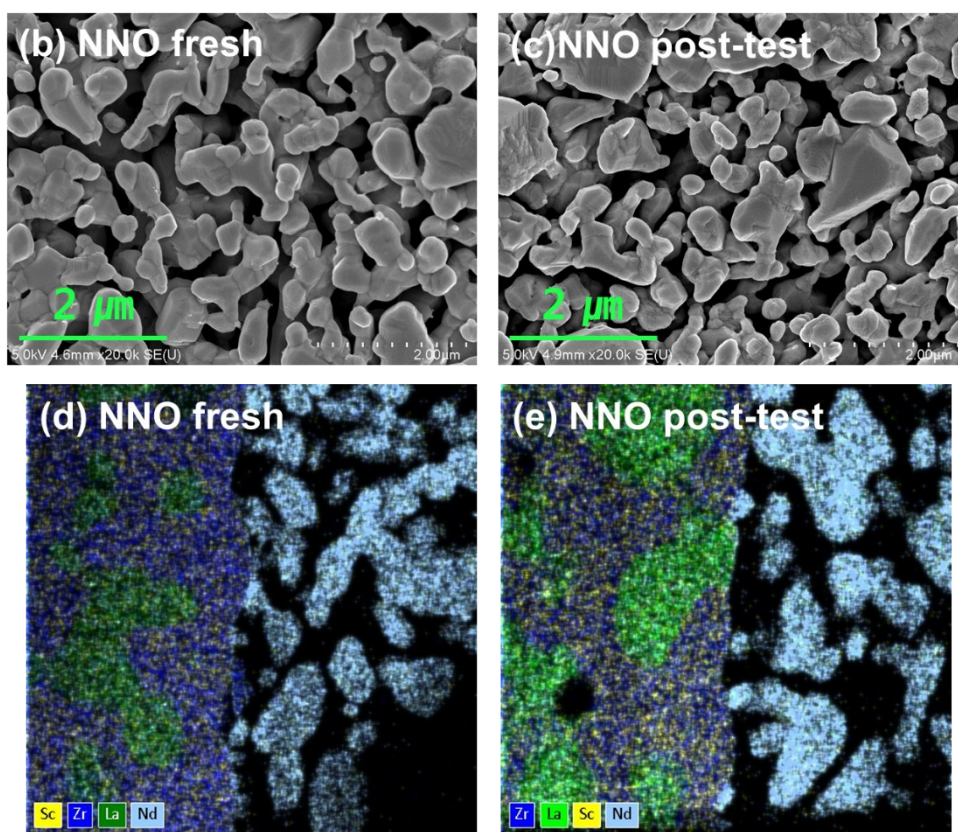

**Fig. S4** (a) XRD patterns of  $\text{Nd}_2\text{NiO}_4$  powder after aging test and  $\text{Nd}_2\text{NiO}_4$  coating layer after permeation test. (b-c) Surface images of NNO coating layer before and after permeation test (d-e) HR-TEM EDS mapping of NNO coated membrane before and after permeation test under air/ $\text{CO}_2$  condition at 850  $^\circ\text{C}$  for 100 h.

**Fig. S4** shows the SEM/TEM/XRD analysis of post-tested samples exposed to CO<sub>2</sub> at 850 °C for 100 hours. No differences in the results before and after permeation testing were observed in the post-test analysis of SEM, XRD, and TEM of NNO coating layer.

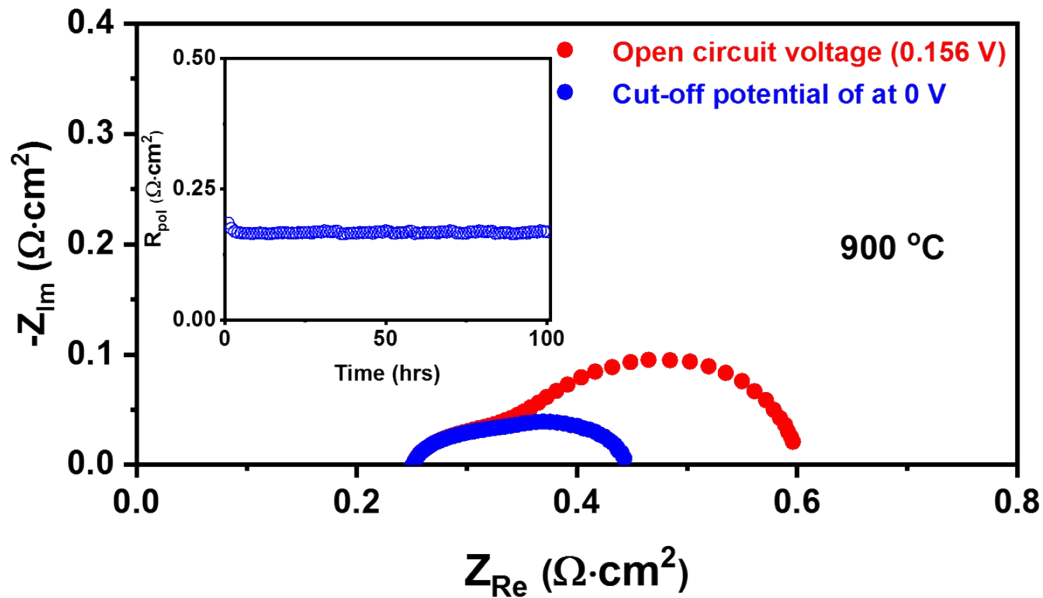

**Fig. S5** Impedance spectra of the NNO coated membrane measured at open circuit voltage and at cut-off potential of at 0 V, (inset) Time-dependence stability test of polarization resistance under oxygen permeation condition.

**Fig. S5** shows the time-dependence stability of the polarization resistance under real operating condition. The prepared NNO coated membranes [10 vol.% LSM- 90 vol.% ScSZ], which can be considered as the concentration cell, exhibit an open circuit voltage of 0.156 V under air/He gradient at 900 °C. Since the oxygen is not transported across the concentration cell in the OCV condition, the stability test was conducted at cut-off potential of at 0 volt which can implement the oxygen permeation. No deterioration of the polarization resistance was observed for 100 hours.
